# Supplementary material for: Arsenic concentration and speciation of the marine hyperaccumulator whelk Buccinum undatum collected in coastal waters of Northern Britain
Source: Royal Society of Chemistry journal article supplement (doi:10.1039/b924351h), 2010-01-01
Supplement: b924351h.pdf [file b924351h.pdf]

**Electronic supplementary data (D.S. Urgast et al.)**

**Table S1:** Arsenic concentration in two pooled whelks (*Buccinum undatum*) samples (n=10) from each location in mg/kg fresh and dry weight as well as the water content in %. The date of sampling and the description of the location are given as well.

| Nr of Location | Sampling site           | Day of sampling | As conc. (mg/kg) f.w. | As conc. (mg/kg) d.w. | Moisture content (%) |
|----------------|-------------------------|-----------------|-----------------------|-----------------------|----------------------|
| 1              | Rothesay (Outer Clyde)  | 25/10/06        | 37.5 ± 0.3            | 142                   | 73.6                 |
| 2a             | Kirkwall (Orkney)       | 19/10/06        | 12.9 ± 0.1            | 45.9                  | 71.9                 |
| 2b             | Shapinsay (Orkney)      | 12/10/06        | 14.9 ± 0.5            | 51.4                  | 71.1                 |
| 3              | Inverness (Moray Firth) | 11/11/06        | 22.1 ± 0.7            | 88.8                  | 75.1                 |
| 4              | Grimsby (Humber)        | 18/10/06        | 43.7 ± 0.2            | 163                   | 73.2                 |
| 5              | Lerwick (Shetland)      | 11/10/06        | 13.7 ± 2.3            | 45.3                  | 69.8                 |
| 6              | Eyemouth                | 14/11/06        | 13.1 ± 0.6            | 48.9                  | 73.3                 |
| 7              | Campeltown (Kintyre)    | 05/10/06        | 31.3 ± 0.6            | 111                   | 71.9                 |
| 8              | Mallaig (Argyll)        | 05/12/06        | 12.4 ± 0.4            | 51.4                  | 75.9                 |
| 9              | Tayinloan (Kintyre)     | 28/10/06        | 18.0 ± 0.2            | 64.1                  | 71.9                 |

**Table S2:** Arsenic concentration of male and female whelks collected at Grimsby. SD is standard deviation of the means (n=3).

| Sex              | Mass of whelk tissue (g) | Arsenic conc. (mg/kg f.w.) |
|------------------|--------------------------|----------------------------|
| Male             | 11.3                     | 7.7 ± 1.3                  |
|                  | 14.1                     | 13.5 ± 1.9                 |
|                  | 26.1                     | 22.1 ± 2.5                 |
| <i>Mean ± SD</i> | <i>17.2 ± 7.9</i>        | <i>14.4 ± 7.2</i>          |
| Female           | 13.3                     | 7.1 ± 1.4                  |
|                  | 18.7                     | 12.4 ± 2.0                 |
|                  | 26.9                     | 12.9 ± 1.2                 |
| <i>Mean ± SD</i> | <i>19.6 ± 6.8</i>        | <i>10.8 ± 3.2</i>          |

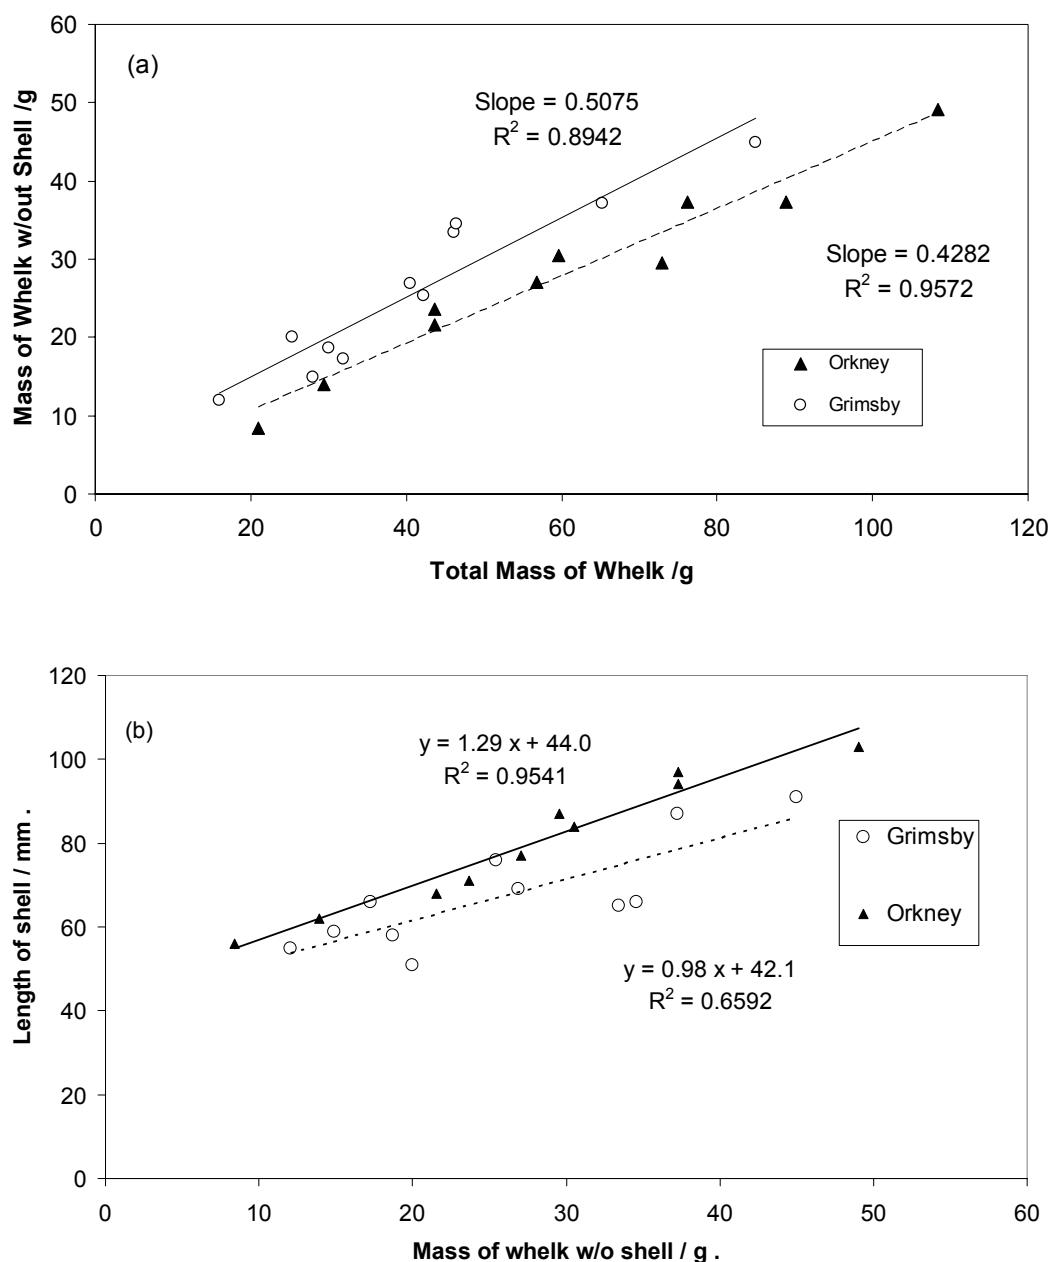

**Figure S1:** (a) shows the relationship of tissue mass in relation to the total weight including the shell. Total whelk without shell is not significantly different between Orkney ( $27.8 \pm 11.9$  g) and Grimsby ( $25.9 \pm 10.5$  g) although the total whelk mass is significantly different (Orkney(Kirkwall):  $60.0 \pm 27.1$  g and Grimsby  $41.5 \pm 19.5$  g). Shell length in relation to mass of whelk without shell is shown in (b). The caught whelks are heavier in relation to the length of the shell. The length of the shells of the Orkney whelks were  $79.9 \pm 15.7$  mm and significantly larger ( $p < 0.05$ ) as the Grimsby shells ( $67.5 \pm 12.7$  mm).

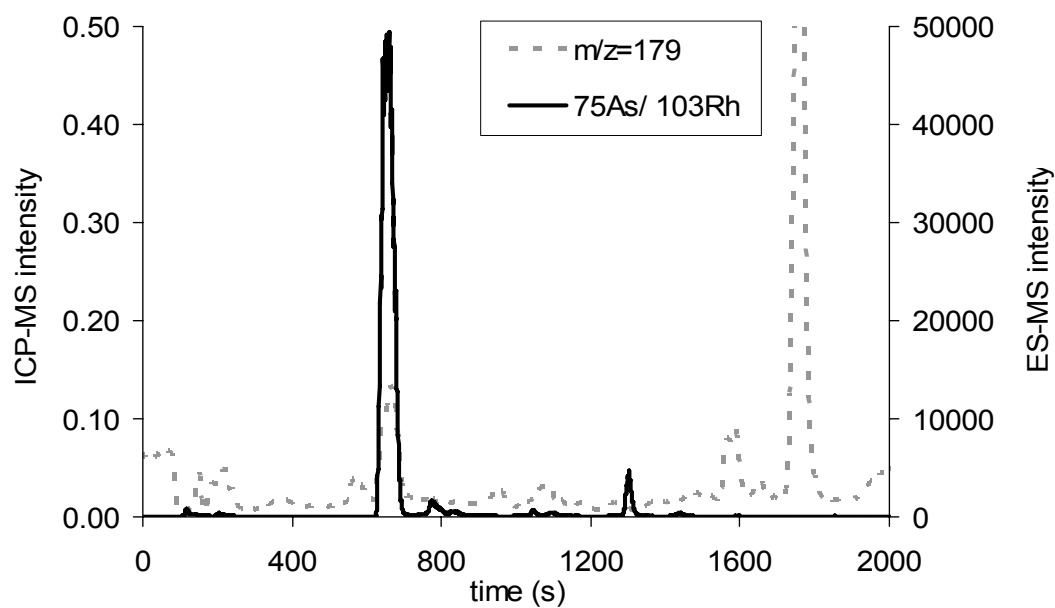

**Figure S2:** Arsenic speciation using cation exchange HPLC-ICP-MS/ ES-MS for the identification of arsenobetaine at retention time 650 s using both elemental identification on m/z 75 (normalised by  $^{103}\text{Rh}$ ) for arsenic using ICP-MS (solid line) and m/z 179 for arsenobetaine using ES-MS (dotted line).

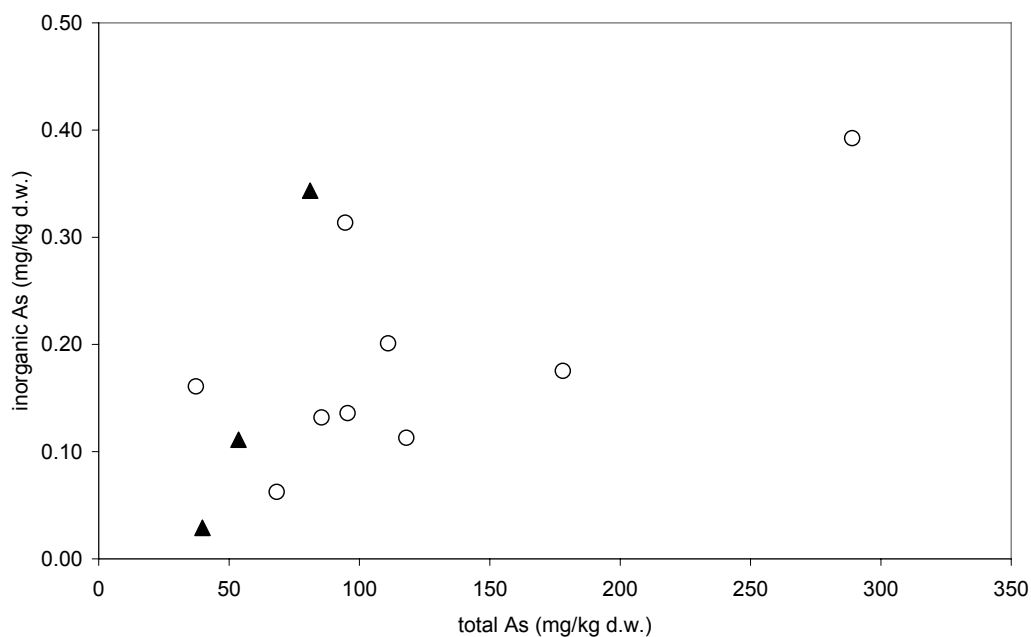

**Figure S3:** correlation of inorganic arsenic with total arsenic in whelks expressed as mg/kg d.w.. (Triangles from Kirkwall and Circles from Grimsby).
